# Supplementary material for: An experimental and field investigation study on geotechnical characterisation and stability assessment of Surbhi Resort landslide at Mussoorie, India
Source: Research Square preprint supplement (doi:10.21203/rs.3.rs-1236161/v1), 2022-02-02
Supplement: Supplementary file 1 [file ec25d14420dd160cbf7acc93.docx]

Highlights

- The study is site specific to assess the stability condition of landslide site
- GPR technology was used for understanding subsurface geology and locating anomalies
- Effect of coarse fraction on shear strength behavior was studied in detail
- The actual field conditions were corroborated with stability assessment
- Stability analysis was carried out and protection measures were suggested
